# Supplementary material for: Inhibition of mTOR induces autophagy and reduces toxicity of polyglutamine expansions in fly and mouse models of Huntington disease
Source: Springer Nature journal article supplement (doi:10.1038/ng1362), 2004-05-16
Supplement: 41588_2004_BFng1362_MOESM2_ESM.pdf [file 41588_2004_BFng1362_MOESM2_ESM.pdf]

**Figure 2**

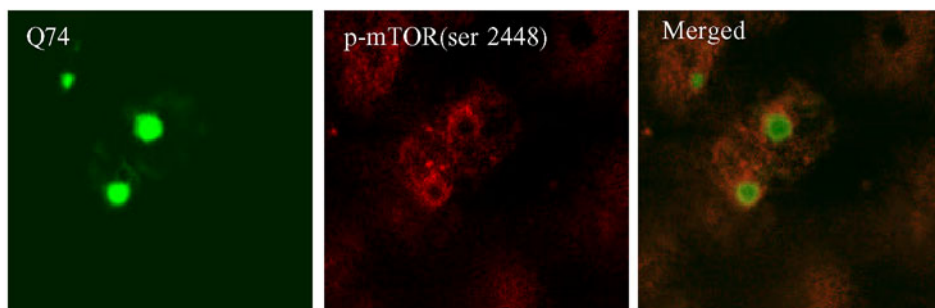

## **Supplementary figure 2**

### **Huntingtin exon-1 aggregates sequester phospho-mTOR.**

COS-7 cells transfected for 48 hours with EGFP-tagged huntingtin exon-1 constructs containing 74 (Q74) glutamine repeats (green) were stained for mTOR (red) with a phospho-specific antibody that recognises mTOR phosphorylated at Ser 2448 (p-mTOR(ser2448)). Aggregates formed by Q74 colocalises with phosphorylated mTOR. The phospho-mTOR immunoreactivity appeared to be localised to the surface of the aggregates, while the total mTOR antibody stained the entire aggregate. The likely explanations for this is that the antibodies have different epitopes, which have different accessibility in the aggregates, or the phosphorylated form of mTOR is found in different parts of the aggregate compared to non-phosphorylated forms.
