# Supplementary material for: Inhibition of mTOR induces autophagy and reduces toxicity of polyglutamine expansions in fly and mouse models of Huntington disease
Source: Springer Nature journal article supplement (doi:10.1038/ng1362), 2004-05-16
Supplement: 41588_2004_BFng1362_MOESM3_ESM.pdf [file 41588_2004_BFng1362_MOESM3_ESM.pdf]

**Figure 3**

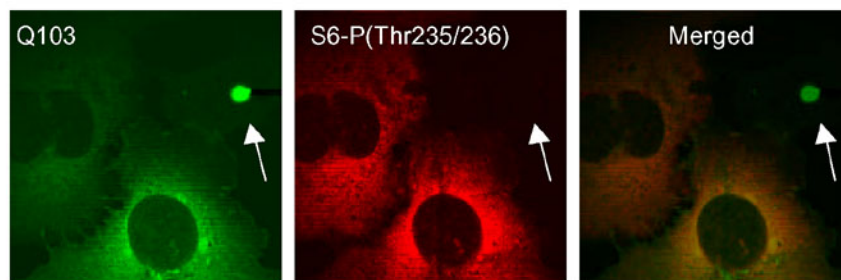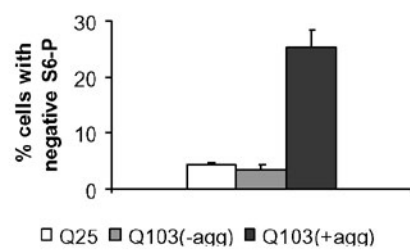

### **Supplementary figure 3**

#### **Q103 cells with aggregates have decreased phospho-S6 immunoactivity.**

COS-7 cells transiently transfected with huntingtin exon-1 constructs with 25 (Q25) or 103(Q103) glutamine repeats (green) were labelled for phospho-S6 (Ser 235/236; red). Cell expressing Q103 with aggregate showed negative staining for phospho-S6 (arrow). Wild-type and mutant cells with (+agg) and without (-agg) aggregates were scored for negative phospho-S6 staining and showed that a significant proportion of mutant cells with aggregates stained negative for phospho-S6.
