# Supplementary material for: Inhibition of mTOR induces autophagy and reduces toxicity of polyglutamine expansions in fly and mouse models of Huntington disease
Source: Springer Nature journal article supplement (doi:10.1038/ng1362), 2004-05-16
Supplement: 41588_2004_BFng1362_MOESM5_ESM.pdf [file 41588_2004_BFng1362_MOESM5_ESM.pdf]

**Figure 5**

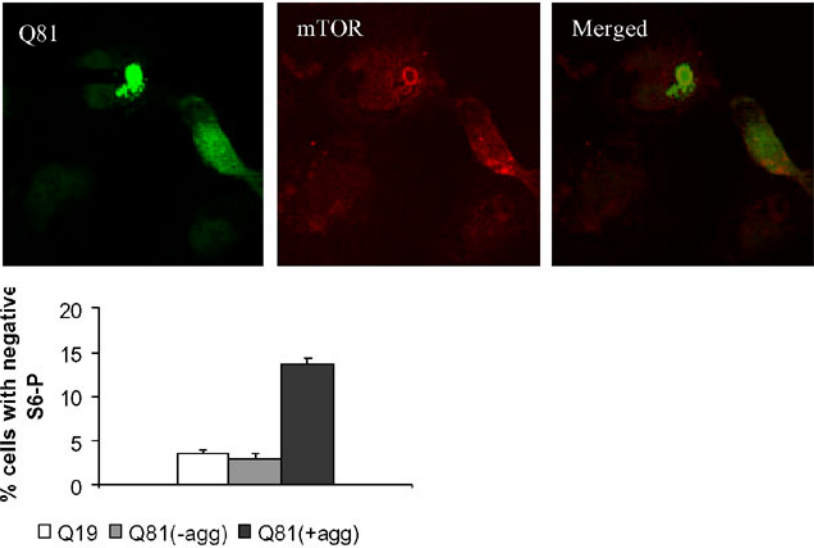

## **Supplementary figure 5**

### **Aggregates of isolated polyglutamines sequester mTOR.**

COS-7 cells transiently transfected for 48h with EGFP tagged to 81 isolated polyglutamines (Q81) (green) and immunostained with anti-mTOR antibody (red) show colocalisation of Q81 aggregates with mTOR (top panel). Staining of Q19- (EGFP-tagged to 19 isolated polyglutamines) or Q81-expressing COS-7 cells with anti-phospho-S6 (S6-P) antibody, and subsequent quantitation of cells with negative staining for S6-P revealed that significant numbers of Q81-expressing cells with aggregates had no S6-P immunoreactivity (bottom panel).
