# Supplementary material for: Inhibition of mTOR induces autophagy and reduces toxicity of polyglutamine expansions in fly and mouse models of Huntington disease
Source: Springer Nature journal article supplement (doi:10.1038/ng1362), 2004-05-16
Supplement: 41588_2004_BFng1362_MOESM6_ESM.pdf [file 41588_2004_BFng1362_MOESM6_ESM.pdf]

**Figure 6**

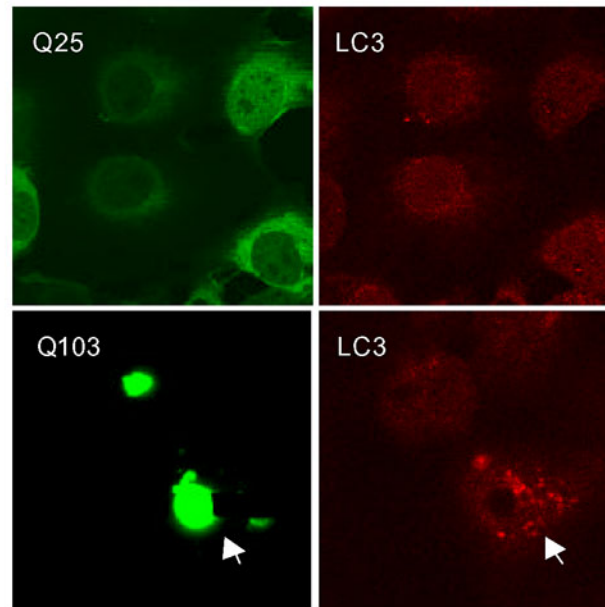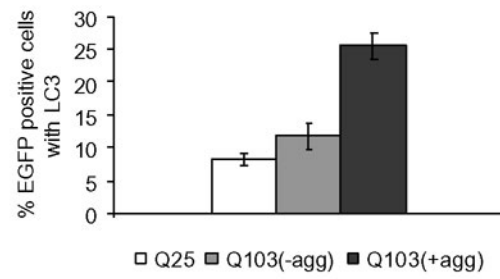

## **Supplementary figure 6**

### **Cells with Q103 aggregates show increased autophagy.**

Immunofluorescence analysis of COS-7 cells expressing Q25 (top panel) or Q103 (middle panel) with anti-LC3 antibody shows increased autophagic vacuoles in Q103 expressing cells with aggregates (bottom). Data were analysed with ANOVA. In each case, there was no significant difference between wild-type cells and cells expressing the mutant protein without aggregates, but there was a significant difference ( $p < 0.005$ ) between wild-type cells and mutant cells with aggregates or between cells expressing the mutant protein without aggregates and mutant cells with aggregates.
