# Supplementary material for: Inhibition of mTOR induces autophagy and reduces toxicity of polyglutamine expansions in fly and mouse models of Huntington disease
Source: Springer Nature journal article supplement (doi:10.1038/ng1362), 2004-05-16
Supplement: 41588_2004_BFng1362_MOESM7_ESM.pdf [file 41588_2004_BFng1362_MOESM7_ESM.pdf]

**Figure 7**

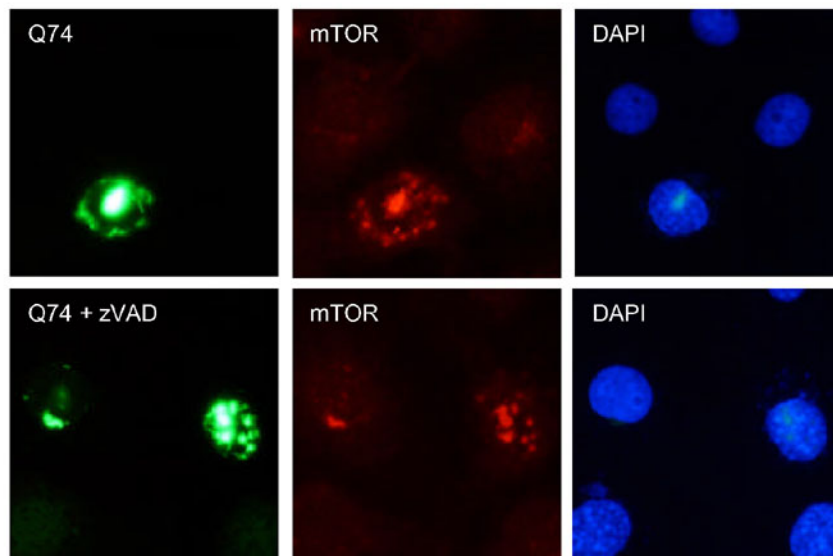

### **Supplementary figure 7**

#### **mTOR colocalises with huntingtin aggregates in non-apoptotic cells.**

Immunostaining with anti-mTOR antibody of COS-7 cells expressing Q74 (green) either untreated (top panel) or treated with a pan-caspase inhibitor z-VAD-fmk (bottom panel) shows colocalisation of mTOR (red) with Q74 aggregates in healthy cells as judged by morphology of DAPI-stained nucleus (blue).
