# Supplementary material for: Inhibition of mTOR induces autophagy and reduces toxicity of polyglutamine expansions in fly and mouse models of Huntington disease
Source: Springer Nature journal article supplement (doi:10.1038/ng1362), 2004-05-16
Supplement: 41588_2004_BFng1362_MOESM8_ESM.pdf [file 41588_2004_BFng1362_MOESM8_ESM.pdf]

**Figure 8**

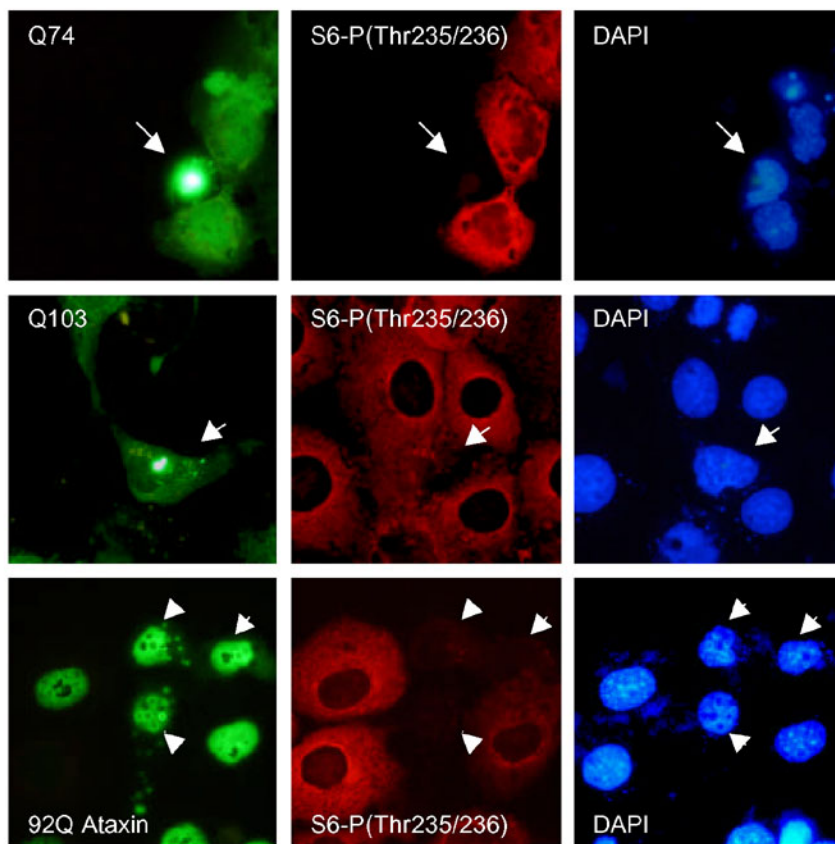

## **Supplementary figure 8**

### **Decreased phospho-S6 immunoreactivity in non-apoptotic cells with aggregates.**

Immunostaining of COS-7 cells expressing Q74 (top panel), Q103 (middle panel) or Ataxin 92Q (bottom panel) (green) with anti-phospho-S6 antibody (red) shows negative staining in aggregate-containing cells (arrows) that are healthy, as judged by morphology of DAPI stained nuclei (blue). Note that some of the nuclei in the top two panels are indented as a consequence of perinuclear aggresome formation by the cytosolic aggregates. This is a phenomenon we and others have frequently observed in HD cell models.
