# Supplementary material for: Inhibition of mTOR induces autophagy and reduces toxicity of polyglutamine expansions in fly and mouse models of Huntington disease
Source: Springer Nature journal article supplement (doi:10.1038/ng1362), 2004-05-16
Supplement: 41588_2004_BFng1362_MOESM9_ESM.pdf [file 41588_2004_BFng1362_MOESM9_ESM.pdf]

**Figure 9**

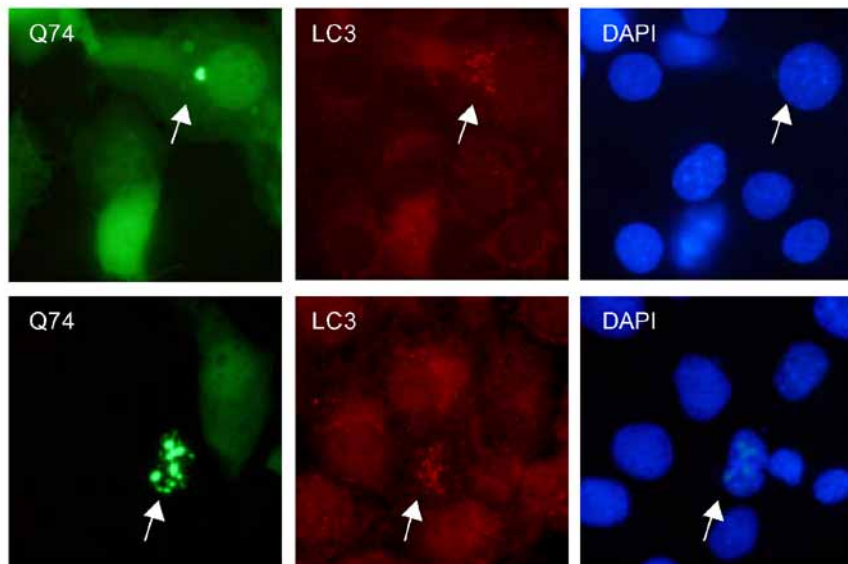

## **Supplementary figure 9**

### **Increased autophagy in non-apoptotic cells with aggregates.**

Immunostaining of COS-7 cells expressing Q74 (green) with anti-LC3 antibody (red) shows increased vesicular staining corresponding to autophagic vacuoles in aggregate-containing cells (arrows) that are healthy as judged by morphology of DAPI stained nuclei (blue).
