# Supplementary material for: Inhibition of mTOR induces autophagy and reduces toxicity of polyglutamine expansions in fly and mouse models of Huntington disease
Source: Springer Nature journal article supplement (doi:10.1038/ng1362), 2004-05-16
Supplement: 41588_2004_BFng1362_MOESM11_ESM.pdf [file 41588_2004_BFng1362_MOESM11_ESM.pdf]

**Figure 11**

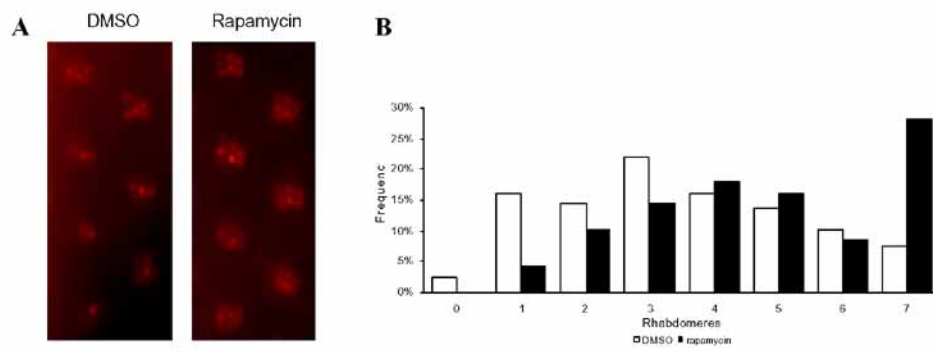

## **Supplementary figure 11**

### **Rapamycin reduces polyglutamine-induced neurodegeneration in *Drosophila*.**

Photographs of ommatidia of HD 120Q flies at 3 days post-eclosion treated with DMSO (control) or rapamycin show more rhabdomeres in the ommatidia of flies treated with rapamycin. Quantification of the frequency of ommatidia with different numbers of visible rhabdomeres shows that rapamycin treatment dramatically increases the numbers of ommatidia in the HD 120Q flies at 3 days post-eclosion.
