# Supplementary material for: Inhibition of mTOR induces autophagy and reduces toxicity of polyglutamine expansions in fly and mouse models of Huntington disease
Source: Springer Nature journal article supplement (doi:10.1038/ng1362), 2004-05-16
Supplement: 41588_2004_BFng1362_MOESM12_ESM.pdf [file 41588_2004_BFng1362_MOESM12_ESM.pdf]

**Figure 12**

**A**

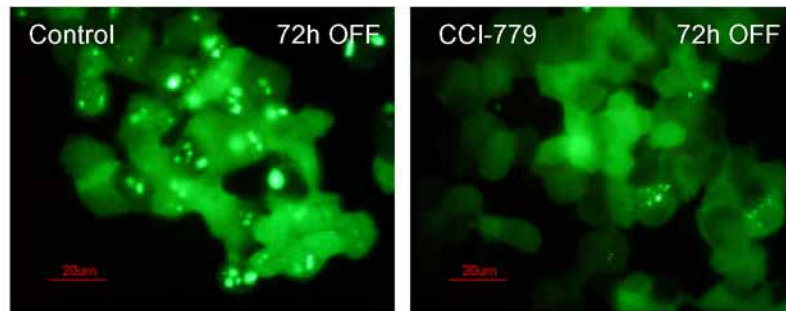

**B**

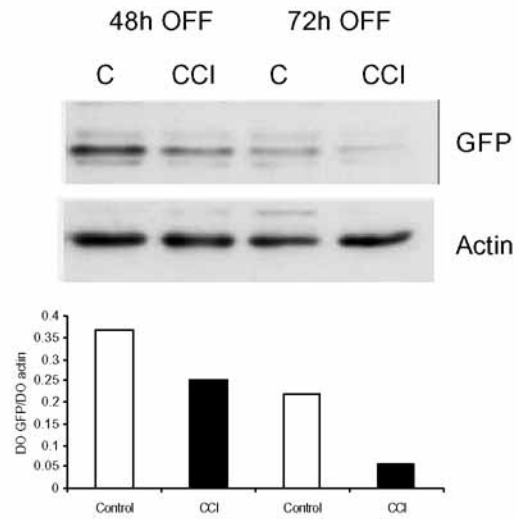

## **Supplementary figure 12**

### **CCI-779 enhances clearance of mutant huntingtin fragments.**

**A. B.** PC12 cells stably expressing huntingtin exon-1 fragment fused to GFP (Q74) were induced for 8h by addition of doxycycline to the culture medium. Q74 expression was then switched off by removing doxycycline and cells were simultaneously treated with either CCI-779 or carrier control, for 48 or 72h. **A.** In presence of CCI-779, the number of GFP-positive aggregates and overall immunofluorescence signal was dramatically decreased compared to the control cells at 72h. **B.** Western blot of cell lysates demonstrating decreased levels of soluble Q74 detected with an anti-GFP antibody (upper panel) after 48h or 72h of CCI-779 treatment. Quantification of huntingtin transgene as a function of actin (empty bars: control, black bars: CCI-779) is shown in the bottom panel. This result was reproducible – for instance when we analysed the mean values from 3 such experiments the reduction of huntingtin exon-1 signal after 48 was significant ( $P < 0.05$ , t test).
