# Supplementary material for: Inhibition of mTOR induces autophagy and reduces toxicity of polyglutamine expansions in fly and mouse models of Huntington disease
Source: Springer Nature journal article supplement (doi:10.1038/ng1362), 2004-05-16
Supplement: 41588_2004_BFng1362_MOESM13_ESM.pdf [file 41588_2004_BFng1362_MOESM13_ESM.pdf]

**Figure 13**

**A TREMORS**

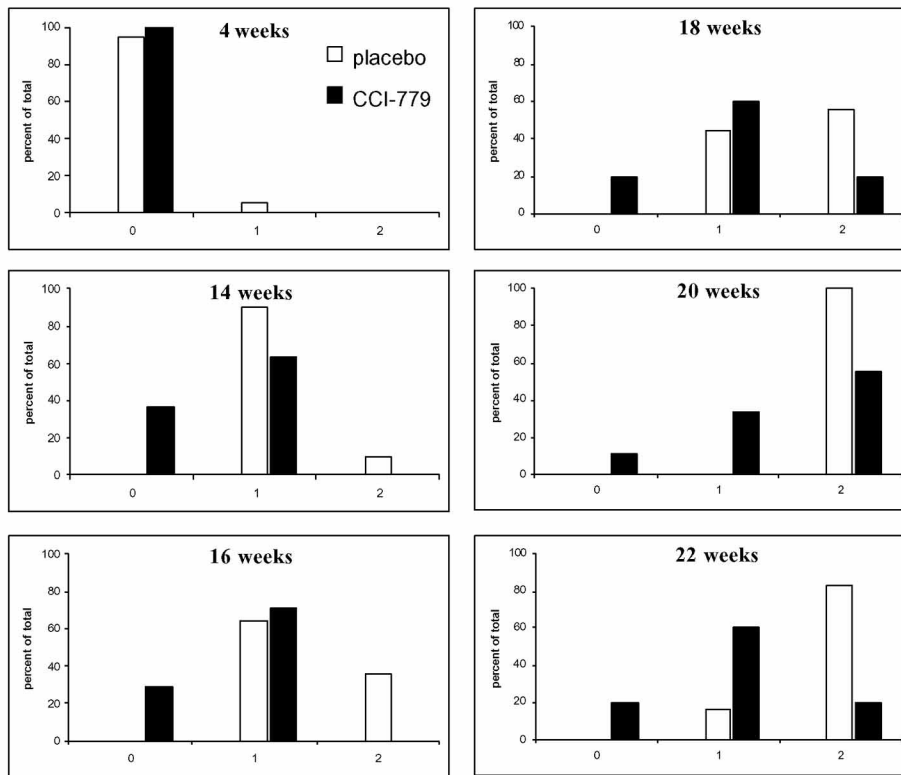

## B WIRE MANOEUVRE

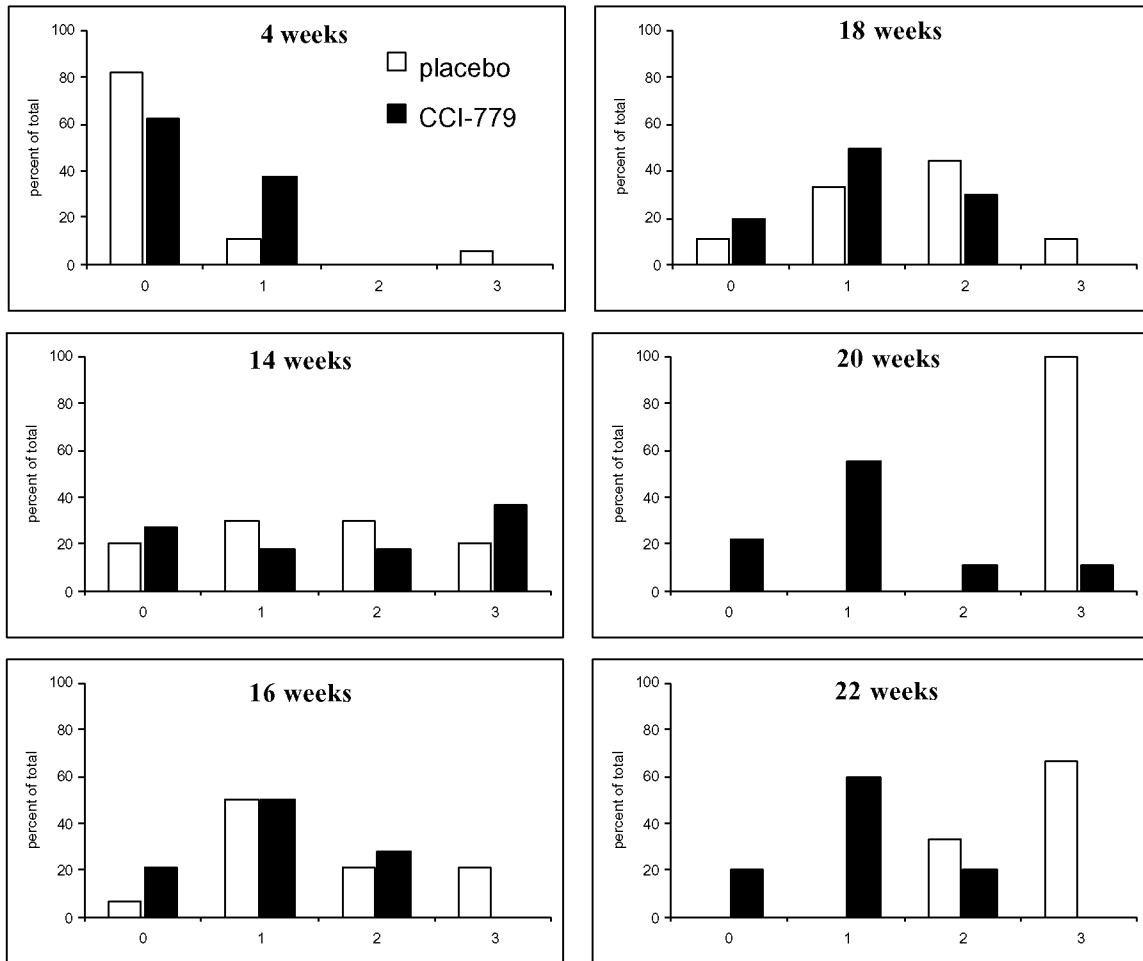

### C GRIP STRENGTH

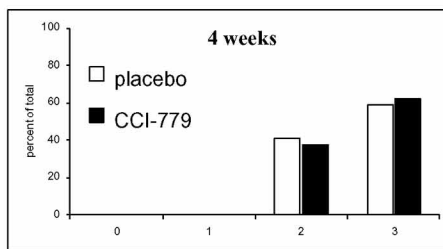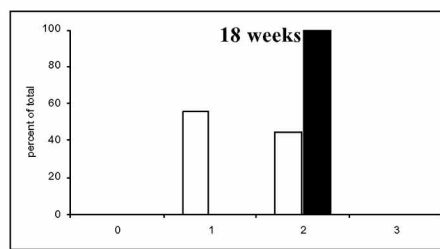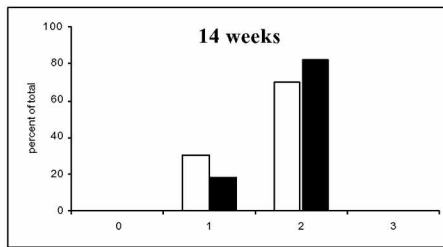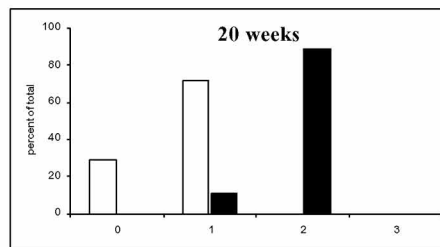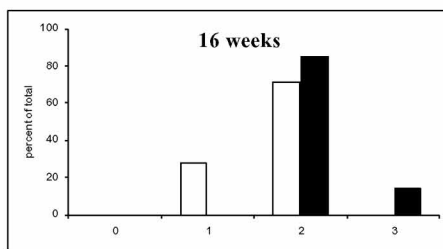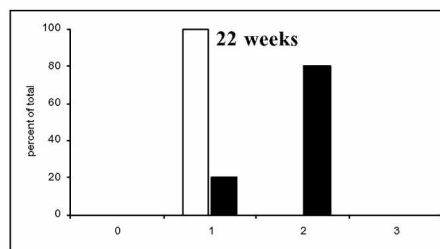

### Supplementary figure 13

CCI-779 improves behaviour and motor performance in HD mouse model. (open bars- placebo; black bars- CCI-779 treated). **A-C.** Behavioural tests in HD transgenic mice (N-terminal 1-171 of huntingtin with 82 glutamine repeats)<sup>16</sup> aged 4 weeks (prior to treatment) ( $n_{\text{CCI}} = 16$ ,  $n_{\text{placebo}} = 17$ ), and after treatment at 14 weeks ( $n_{\text{CCI}} = 11$ ,  $n_{\text{placebo}} = 10$ ), 16 weeks ( $n_{\text{CCI}} = 14$ ,  $n_{\text{placebo}} = 14$ ), 18 weeks ( $n_{\text{CCI}} = 10$ ,  $n_{\text{placebo}} = 9$ ), 20 weeks ( $n_{\text{CCI}} = 9$ ,  $n_{\text{placebo}} = 7$ ), 22 weeks ( $n_{\text{CCI}} = 5$ ,  $n_{\text{placebo}} = 6$ ). We assessed the overall effect of CCI-779 using data from all timepoints assayed after starting treatment using a logistic regression approach (see methods). The control and treated groups were compared for each specific timepoint using Mann-Whitney U tests. **A.** Effect of CCI-779 on the tremors. 0 = no tremors, 1 = mild tremors, 2 = marked tremors. Overall effect with data from all timepoints  $p = 0.0006$ , Odds ratio=0.21 (95% confidence interval 0.098-0.45).  $p_{4 \text{ weeks}} > 0.77$ ,  $p_{14 \text{ weeks}} = 0.20$ ,  $p_{16 \text{ weeks}} = 0.01$ ,  $p_{18 \text{ weeks}} = 0.08$ ,  $p_{20 \text{ weeks}} = 0.14$ ,  $p_{22 \text{ weeks}} = 0.07$ . **B.** Effect of CCI-779 on wire manoeuvre. 0 = active grip with hind legs; 1 = difficulty grasping with hind legs; 2 = unable to grasp with hind legs; 3 = unable to lift hind legs, falls within 10 seconds; 4 = falls immediately. Overall effect with data from all timepoints  $p = 0.02$  Odds ratio = 0.51 (0.29-0.92);  $p_{4 \text{ weeks}} = 0.39$ ,  $p_{14 \text{ weeks}} = 0.55$ ,  $p_{16 \text{ weeks}} = 0.29$ ,  $p_{18 \text{ weeks}} = 0.40$ ,  $p_{20 \text{ weeks}} = 0.003$ ,  $p_{22 \text{ weeks}} = 0.008$ . **C.** Effect of CCI-779 on grip strength. 0 = no grip strength; 1 = slight grip, semi-effective; 2 = moderate grip, effective; 3 = active grip, effective. Overall effect with data from all timepoints  $p < 0.0001$ , Odds ratio = 12.73 (4.35-37.2);  $p_{4 \text{ weeks}} = 0.85$ ,  $p_{14 \text{ weeks}} = 0.6472$ ,  $p_{16 \text{ weeks}} = 0.1827$ ,  $p_{18 \text{ weeks}} = 0.0412$ ,  $p_{20 \text{ weeks}} = 0.0021$ ,  $p_{22 \text{ weeks}} = 0.0285$ .
