# Supplementary material for: Inhibition of mTOR induces autophagy and reduces toxicity of polyglutamine expansions in fly and mouse models of Huntington disease
Source: Springer Nature journal article supplement (doi:10.1038/ng1362), 2004-05-16
Supplement: 41588_2004_BFng1362_MOESM14_ESM.pdf [file 41588_2004_BFng1362_MOESM14_ESM.pdf]

**Figure 14**

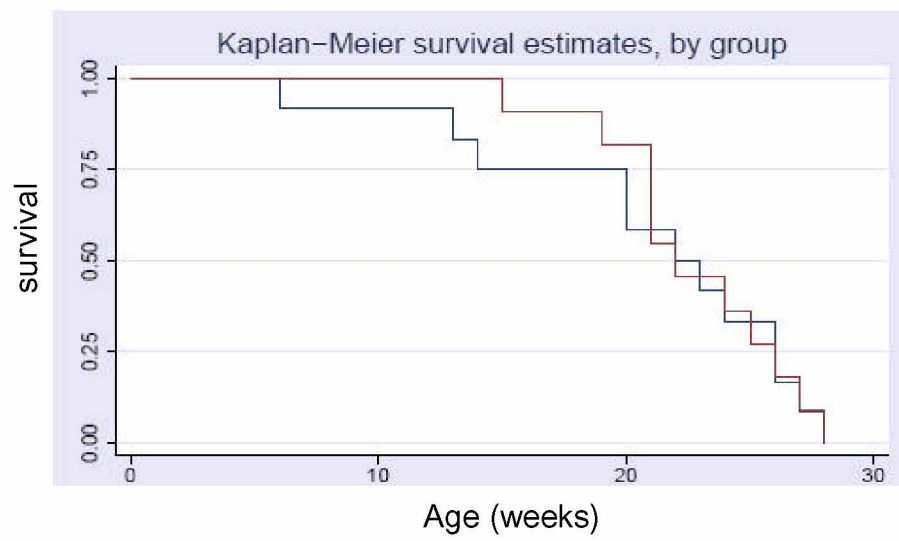

### **Supplementary figure 14**

Kaplan-Meier survival curve for HD mice. Black = placebo treated (n=12 at start of experiment); Red = CCI-treated (n=11 at start of experiment). CCI-779 has no significant effect on survival. No non-transgenic animals died during the experiment.
